# Supplementary material for: The conserved tyrosine residue 940 plays a key structural role in membrane interaction of Bordetella adenylate cyclase toxin
Source: PubMed Central journal article supplement (PMC5571180; doi:10.1038/s41598-017-09575-6), 2017-08-24
Supplement: 41598_2017_9575_MOESM1_ESM.pdf [file 41598_2017_9575_MOESM1_ESM.pdf]

## Supplementary Information

The conserved tyrosine residue 940 plays a key structural role in membrane interaction of *Bordetella* adenylate cyclase toxin

Jiri Masin, Jana Roderova, Adriana Osickova, Petr Novak, Ladislav Bumba, Radovan Fiser, Peter Sebo and Radim Osicka

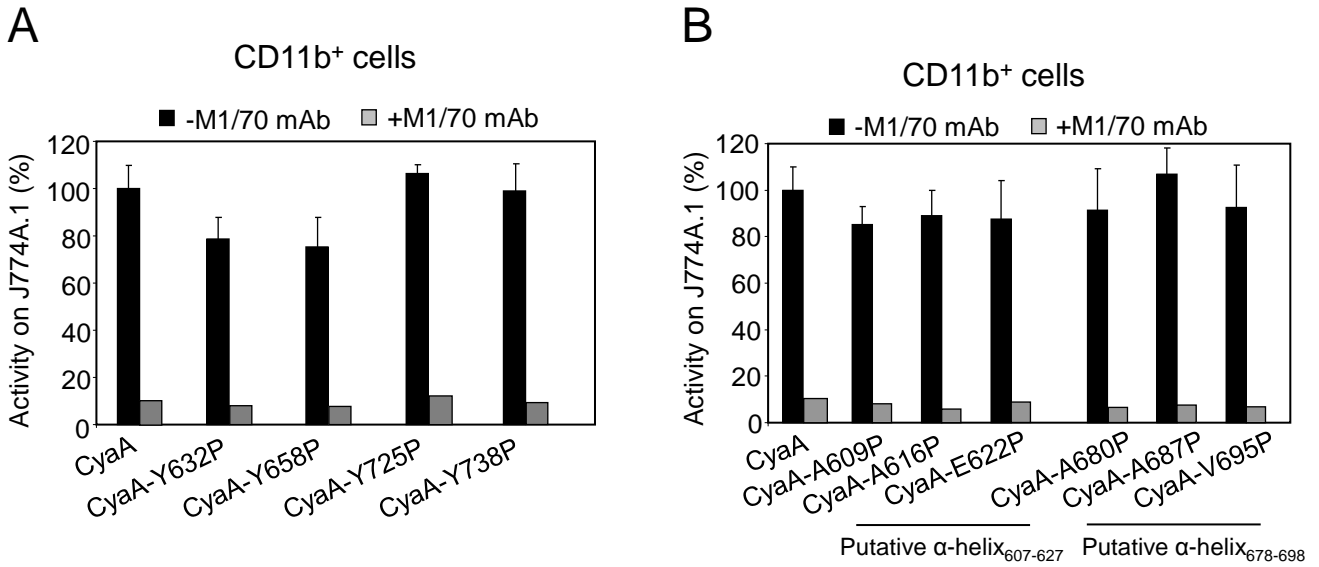

**Supplementary Figure S1. Binding of the CyaA mutants to macrophages can be blocked by CD11b-specific antibody. (A, B)** Binding of intact CyaA or its mutant variants to J774A.1 cells ( $1 \times 10^6$ ) was determined as the amount of total cell-associated AC enzyme activity upon incubation of cells with  $1 \mu\text{g/ml}$  of the protein for 30 min at  $4^\circ\text{C}$ . To block the CR3 receptor of CyaA, J774A.1 cells ( $10^6/\text{ml}$ ) were preincubated for 30 minutes on ice with  $5 \mu\text{g/ml}$  of the CD11b-specific monoclonal antibody M1/70 (Pharmingen) prior to addition of the CyaA variants ( $1 \mu\text{g/ml}$ ). Activities in the absence of antibody (-M1/70 mAb) are expressed as percentages of intact CyaA activity and represent average values  $\pm$  standard deviations from at least three independent determinations performed in duplicate with two different toxin preparations. Activities in the presence of antibody (+M1/70 mAb) are expressed as percentages of intact CyaA activity and represent average from two independent determinations performed in monoplicate.

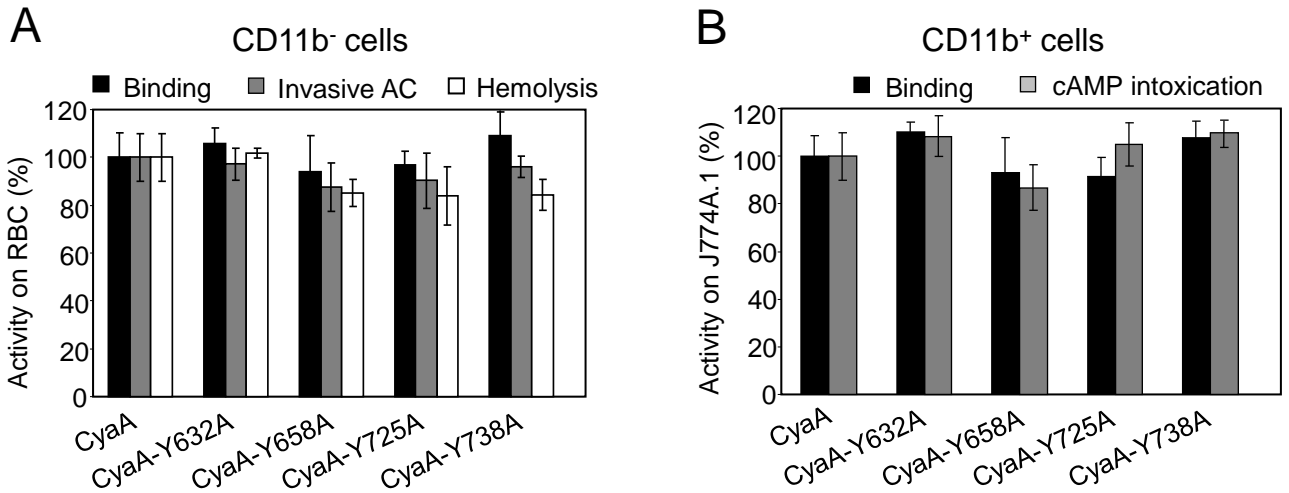

**Supplementary Figure S2. Replacement of the key tyrosine residues by alanine residues in the putative CRAC motifs of the hydrophobic domain of CyaA has no significant effect on cell binding, AC domain translocation and pore-forming capacities of toxin variants. (A)** Sheep erythrocytes ( $5 \times 10^8/\text{ml}$ ) were incubated at  $37^\circ\text{C}$  with  $1 \mu\text{g}/\text{ml}$  ( $5 \text{ nM}$ ) of intact CyaA or its mutant variants and after 30 min, aliquots were taken for determinations of the cell-associated AC activity and of the AC activity internalized into erythrocytes and protected against digestion by externally added trypsin. For determination of hemolytic activity, sheep erythrocytes ( $5 \times 10^8/\text{ml}$ ) were incubated at  $37^\circ\text{C}$  in the presence of  $10 \mu\text{g}/\text{ml}$  ( $50 \text{ nM}$ ) of intact CyaA or its mutant variants. Hemolytic activity was measured after 4 hours as the amount of released hemoglobin by photometric determination ( $A_{541\text{nm}}$ ). **(B)** Binding of intact CyaA or its mutant variants to J774A.1 cells ( $1 \times 10^6$ ) was determined as the amount of total cell-associated AC enzyme activity upon incubation of cells with  $1 \mu\text{g}/\text{ml}$  ( $5 \text{ nM}$ ) of the protein for 30 min at  $4^\circ\text{C}$ . cAMP intoxication was assessed by determining the intracellular concentration of cAMP generated in cells after 30 minutes of incubation of J774A.1 cells ( $2 \times 10^5$ ) with four different toxin concentrations from within the linear range of the dose-response curve (100, 50, 25 and 10 ng/ml). **(A, B)** Activities are expressed as percentages of intact CyaA activity and represent average values  $\pm$  standard deviations from three independent determinations performed in duplicate with two different toxin preparations.

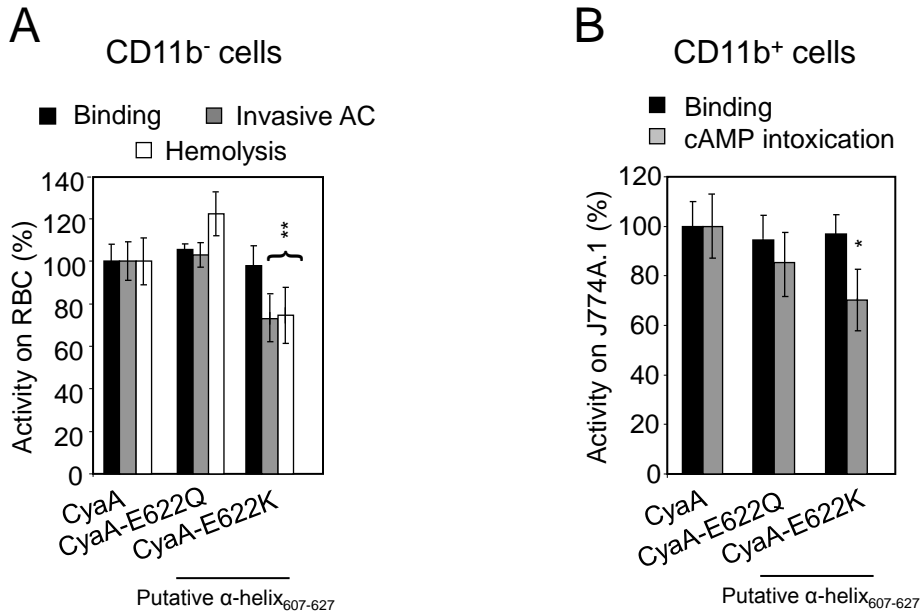

**Supplementary Figure S3. Replacement of the negatively charged glutamate residue 622 by a neutral glutamine or by an oppositely charged lysine residue in the predicted  $\alpha$ -helix (residues 607 to 627 of CyaA) has little or no impact on the toxin activities. (A, B)** Preparations and analyses of the samples were performed as in the legend to Supplementary Fig. S2. Activities are expressed as percentages of intact CyaA activity and represent average values  $\pm$  standard deviations from at least three independent determinations performed in duplicate with two different toxin preparations. Significant differences are indicated by asterisks (\*,  $p < 0.05$ ; \*\*,  $p < 0.01$ ).
